# Supplementary material for: Abdominal obesity and colorectal cancer risk: systematic review and meta-analysis of prospective studies
Source: PubMed Central journal article supplement (PMC5725611; doi:10.1042/bsr20170945), 2017-12-12

# Supplementary Materials: Abdominal Obesity and Colorectal Cancer Risk: Systematic Review and Meta-Analysis of Prospective Studies

Yunlong Dong, Jiao Zhou, Yun Zhu, Tao He, Hong Hu, Hao Liu, Dan Luo, Shuanglan Xu, Lifen Xu, Jun Zhang and Zhaowei Teng

Table S1. Quality assessment according to the nine-star Newcastle-Ottawa Scale (NOS)<sup>a</sup>.

| Study                         | Selection                            |                                     |                           | Demonstration That Outcome of Interest Was Not Present at Start of Study | Comparability of Cohorts on the Basis of the Design or Analysis | Outcome Assessment of Outcome | Was Followed Up Enough for Outcomes to Occur | Long Follow Up of Cohorts | Adequacy of Follow Up of Cohorts | Total Stars |
|-------------------------------|--------------------------------------|-------------------------------------|---------------------------|--------------------------------------------------------------------------|-----------------------------------------------------------------|-------------------------------|----------------------------------------------|---------------------------|----------------------------------|-------------|
|                               | Representativeness of Exposed Cohort | Selection of the Non-Exposed Cohort | Ascertainment of Exposure |                                                                          |                                                                 |                               |                                              |                           |                                  |             |
| Moore(ages 30–54 y)(2004) USA | 1                                    | 1                                   | 1                         | 1                                                                        | 2                                                               | 1                             | 1                                            | 0                         | 8                                |             |
| Moore(ages 55–79 y)(2004) USA | 1                                    | 1                                   | 1                         | 1                                                                        | 2                                                               | 1                             | 1                                            | 0                         | 8                                |             |
| Larsson(2006) Sweden          | 0                                    | 1                                   | 1                         | 1                                                                        | 2                                                               | 1                             | 1                                            | 0                         | 7                                |             |
| Pischon(2006) Europe          | 1                                    | 1                                   | 1                         | 1                                                                        | 2                                                               | 1                             | 1                                            | 0                         | 8                                |             |
| MacInnis(2005) Australia      | 0                                    | 1                                   | 1                         | 1                                                                        | 2                                                               | 1                             | 1                                            | 0                         | 7                                |             |
| Giovannucci(1995) USA         | 1                                    | 1                                   | 1                         | 1                                                                        | 2                                                               | 1                             | 1                                            | 0                         | 8                                |             |
| Martinez(1997) USA            | 1                                    | 1                                   | 1                         | 1                                                                        | 2                                                               | 1                             | 1                                            | 0                         | 8                                |             |
| Bostick(1994) USA             | 0                                    | 1                                   | 1                         | 1                                                                        | 2                                                               | 1                             | 1                                            | 0                         | 7                                |             |
| MacInnis(2004) Australia      | 0                                    | 1                                   | 1                         | 1                                                                        | 2                                                               | 1                             | 1                                            | 0                         | 7                                |             |
| Wang(2008) USA                | 1                                    | 1                                   | 1                         | 1                                                                        | 2                                                               | 1                             | 1                                            | 0                         | 8                                |             |
| Oxentenko(2010) USA           | 1                                    | 1                                   | 1                         | 1                                                                        | 2                                                               | 1                             | 1                                            | 0                         | 8                                |             |
| Li(2013) China                | 0                                    | 1                                   | 1                         | 1                                                                        | 2                                                               | 1                             | 1                                            | 0                         | 7                                |             |
| Keimling(2013) USA            | 0                                    | 1                                   | 1                         | 1                                                                        | 2                                                               | 1                             | 1                                            | 0                         | 7                                |             |
| Kabat(2015) USA               | 0                                    | 1                                   | 1                         | 1                                                                        | 2                                                               | 1                             | 1                                            | 0                         | 7                                |             |
| Park(2011) UK                 | 1                                    | 1                                   | 1                         | 1                                                                        | 2                                                               | 1                             | 1                                            | 0                         | 8                                |             |
| Folsom(2000) USA              | 0                                    | 1                                   | 1                         | 1                                                                        | 2                                                               | 1                             | 1                                            | 0                         | 7                                |             |
| Schoen(1999) USA              | 0                                    | 1                                   | 1                         | 1                                                                        | 1                                                               | 1                             | 1                                            | 0                         | 6                                |             |
| MacInnis(2006) Australia      | 0                                    | 1                                   | 1                         | 1                                                                        | 2                                                               | 1                             | 1                                            | 0                         | 7                                |             |
| Ahmed(2006) USA               | 1                                    | 1                                   | 1                         | 1                                                                        | 2                                                               | 1                             | 1                                            | 0                         | 8                                |             |

<sup>a</sup> A study can be awarded a maximum of one star for each numbered item within the Selection and Outcome categories and a maximum of two stars for Comparability.

Table S2. Detailed amounts of waist circumference and waist to hip ratio.

| Study                         | Measure of Adiposity | Categories(Measurement Unit)                               | Highest vs. Lowest(Measurement Unit) |
|-------------------------------|----------------------|------------------------------------------------------------|--------------------------------------|
| Moore(ages 30–54 y)(2004) USA | WC                   | Men: <83.8cm 83.8-<94.0cm 94.0-<101.6cm ≥101.6cm           | Men: <83.8cm vs. ≥101.6cm            |
|                               |                      | Women: <81.3cm 81.3-<91.4cm 91.4-<99.1cm ≥99.1cm           | Women: <81.3cm vs. ≥99.1cm           |
| Moore(ages 55–79 y)(2004) USA | WC                   | Men: <83.8cm 83.8-<94.0cm 94.0-<101.6cm ≥101.6cm           | Men: <83.8cm vs. ≥101.6cm            |
|                               |                      | Women: <81.3cm 81.3-<91.4cm 91.4-<99.1cm ≥99.1cm           | Women: <81.3cm vs. ≥99.1cm           |
| Larsson(2006) Sweden          | WC                   | Men: <88cm 88-92cm 93-97cm 98-103cm ≥104cm                 | Men: <88cm vs. ≥104cm                |
|                               |                      | Men: <86.0cm 86.0-91.8cm 91.9-96.5cm 96.6-102.9cm ≥103.0cm | Men: <86.0cm vs. ≥103.0cm            |
| Pischon(2006) Europe          | WHR                  | Women: <70.2cm 70.2-75.8cm 75.9-80.9cm 81.0-88.9cm ≥89.0cm | Women: <70.2cm vs. ≥89.0cm           |
|                               |                      | Men: <0.887 0.887-0.922 0.923-0.952 0.953-0.989 ≥0.990     | Men: <0.887 vs. ≥0.990               |
| Maclnnis(2005) Australia      | WHR                  | Women: <0.734 0.734-0.768 0.769-0.802 0.803-0.845 ≥0.846   | Women: <0.734 vs. ≥0.846             |
|                               |                      | Women: <80cm 80-87cm ≥88cm                                 | Women: <80cm vs. ≥88cm               |
| Giovannucci(1995) USA         | WHR                  | Women: <0.75 0.75-0.79 ≥0.80                               | Women: <0.75 vs. ≥0.80               |
|                               |                      | Men: <35in 35-36.9in 37-38.9in 39-42.9in ≥43in             | Men: <35in vs. ≥43in                 |
| Martinez(1997) USA            | WHR                  | Men: <0.90 0.90-0.92 0.93-0.94 0.95-0.98 ≥0.99             | Men: <0.90 vs. ≥0.99                 |
|                               |                      | Women: ≤27.5in >34in                                       | Women: ≤27.5in vs. >34in             |
| Bostick(1994) USA             | WHR                  | Women: <0.728 0.728-0.758 0.759-0.790 0.791-0.833 >0.833   | Women: <0.728 vs. >0.833             |
|                               |                      | Women: <0.764 0.764-0.808 0.809-0.852 0.853-0.906 >0.906   | Women: <0.764 vs. >0.906             |
| Maclnnis(2004) Australia      | WHR                  | Men: <87.0cm 87.0-92.9cm 93.0-99.3cm >99.3cm               | Men: <87.0cm vs. >99.3cm             |
|                               |                      | Men: <0.88 0.88-0.92 0.93-0.96 >0.96                       | Men: <0.88 vs. >0.96                 |
| Wang(2008) USA                | WC                   | Men: <95cm 95-<105cm 105-<120cm ≥120cm                     | Men: <95cm vs. ≥120cm                |
|                               |                      | Women: <85cm 85-<95cm 95-<110cm ≥110cm                     | Women: <85cm vs. ≥110cm              |
| Oxentenko(2010) USA           | WC                   | Women: ≤77.15cm 77.16-86.04cm 86.05-96.52cm ≥96.53cm       | Women: ≤77.15cm vs. ≥96.53cm         |

|                          |     |                                                                                                                                              |                                                                       |
|--------------------------|-----|----------------------------------------------------------------------------------------------------------------------------------------------|-----------------------------------------------------------------------|
|                          | WHR | Women: $\leq 0.78$ 0.79-0.83 0.84-0.89 $\geq 0.90$                                                                                           | Women: $\leq 0.78$ vs. $\geq 0.90$                                    |
| Li(2013) China           | WC  | Men: <78cm 78-82cm 83-86cm 87-91cm $\geq 92$ cm<br>Women: <70cm 70-74cm 75-79cm 80-84cm $\geq 85$ cm                                         | Men: <78cm vs. $\geq 92$ cm<br>Women: <70cm vs. $\geq 85$ cm          |
|                          | WHR | Men: <0.85 0.85-0.88 0.89-0.90 0.91-0.94 $\geq 0.95$<br>Women: <0.77 0.77-0.78 0.79-0.81 0.82-0.84 $\geq 0.85$                               | Men: <0.85 vs. $\geq 0.95$<br>Women: <0.77 vs. $\geq 0.85$            |
|                          | WC  | Men: <89.5cm 89.5-<93.5cm 93.5-<99.0cm 99.0-<106.5cm $\geq 106.5$ cm<br>Women: <73.6cm 73.6-<80.0cm 80.0-<86.0cm 86.0-<94.5cm $\geq 94.5$ cm | Men: <89.5cm vs. $\geq 106.5$ cm<br>Women: <73.6cm vs. $\geq 94.5$ cm |
| Keimling(2013) USA       | WHR | Men: <0.898 0.898-<0.929 0.929-<0.956 0.956-<1.000 $\geq 1.000$<br>Women: <0.746 0.746-<0.786 0.786-<0.826 0.826-<0.877 $\geq 0.877$         | Men: <0.898 vs. $\geq 1.000$<br>Women: <0.746 vs. $\geq 0.877$        |
| Kabat(2015) USA          | WC  | ND                                                                                                                                           | ND                                                                    |
|                          | WHR | ND                                                                                                                                           | ND                                                                    |
| Park(2011) UK            | WC  | Men: <88.0cm 88.0-93.0cm 93.1-97.6cm 97.7-103.2cm $\geq 103.3$ cm<br>Women: <73.0cm 73.0-78.0cm 78.1-83.3cm 83.4-90.4cm $\geq 90.5$ cm       | Men: <88.0cm vs. $\geq 103.3$ cm<br>Women: <73.0cm vs. $\geq 90.5$ cm |
|                          | WHR | Men: <0.883 0.883-0.915 0.916-0.944 0.945-0.978 $\geq 0.979$<br>Women: <0.739 0.739-0.772 0.773-0.803 0.804-0.843 $\geq 0.844$               | Men: <0.883 vs. $\geq 0.979$<br>Women: <0.739 vs. $\geq 0.844$        |
|                          | WC  | Women: <74.3cm 74.3-<80.0cm 80.0-<87.3cm 87.3cm-<96.0cm $\geq 96.0$ cm                                                                       | Women: <74.3cm vs. $\geq 96.0$ cm                                     |
| Folsom(2000) USA         | WHR | Women: <0.762 0.762-<0.805 0.805-<0.848 0.848-<0.901cm $\geq 0.901$                                                                          | Women: <0.762 vs. $\geq 0.901$                                        |
| Schoen(1999) USA         | WC  | Men: 69-91cm 91.1-97cm 97.1-104cm 104.1-145.5cm<br>Women: 32.5-82cm 82.1-91.5cm 91.6-101.1cm 101.2-167cm                                     | Men: 69-91cm vs. 104.1-145.5cm<br>Women: 32.5-82cm vs. 101.2-167cm    |
|                          | WHR | Men: 0.61-0.93 0.931-0.97 0.971-1.00 1.01-2.33<br>Women: 0.61-0.83 0.831-0.90 0.91-0.96 0.961-2.06                                           | Men: 0.61-0.93 vs. 1.01-2.33<br>Women: 0.61-0.83 vs. 0.961-2.06       |
|                          | WC  | Men: <94cm 94-101.9cm $\geq 102$ cm<br>Women: <80cm 80-87.9cm $\geq 88$ cm                                                                   | Men: <94cm vs. $\geq 102$ cm<br>Women: <80cm vs. $\geq 88$ cm         |
| MacInnis(2006) Australia | WHR | Men: <0.90 0.90-0.94 $\geq 0.95$<br>Women: <0.75 0.75-0.79 $\geq 0.80$                                                                       | Men: <0.90 vs. $\geq 0.95$<br>Women: <0.75 vs. $\geq 0.80$            |
| Ahmed(2006) USA          | WC  | Men: <102cm $\geq 102$ cm<br>Women: <88cm $\geq 88$ cm                                                                                       | Men: <102cm vs. $\geq 102$ cm<br>Women: <88cm vs. $\geq 88$ cm        |

WC, waist circumference; WHR, waist to hip ratio; ND, no data.

**Figure S1.** (a) Pooled relative risk of CC associated with waist circumference; (b) Pooled relative risk of CC associated with waist to hip ratio; (c) Pooled relative risk of RC associated with waist circumference; (d) Pooled relative risk of RC associated with waist to hip ratio

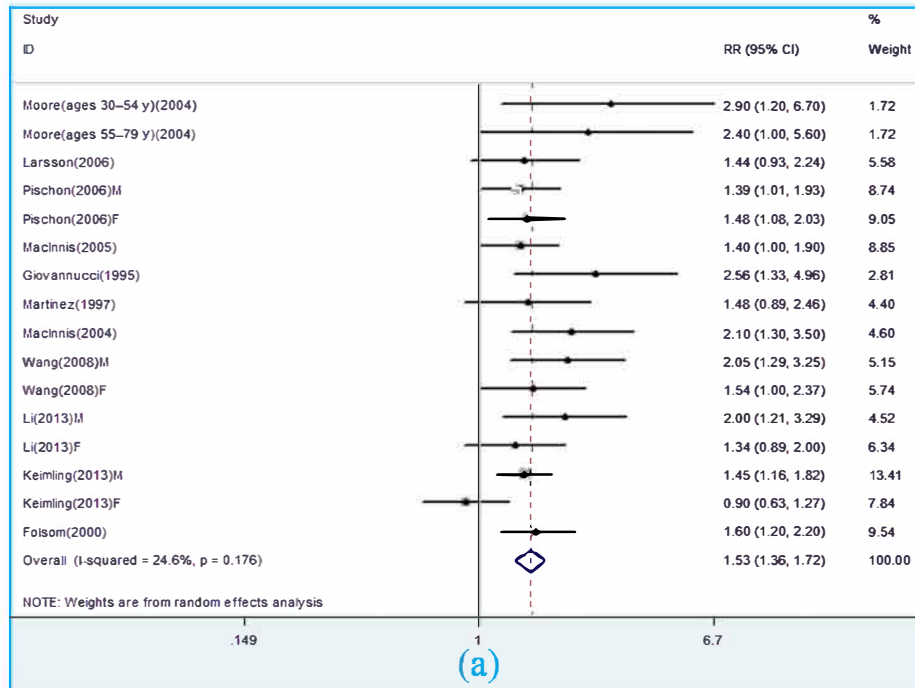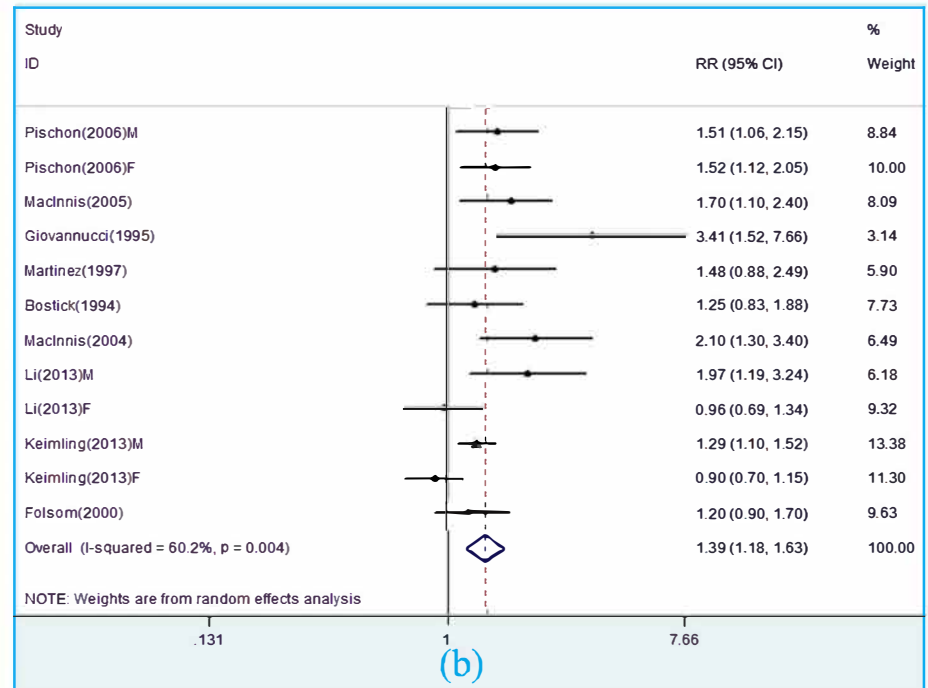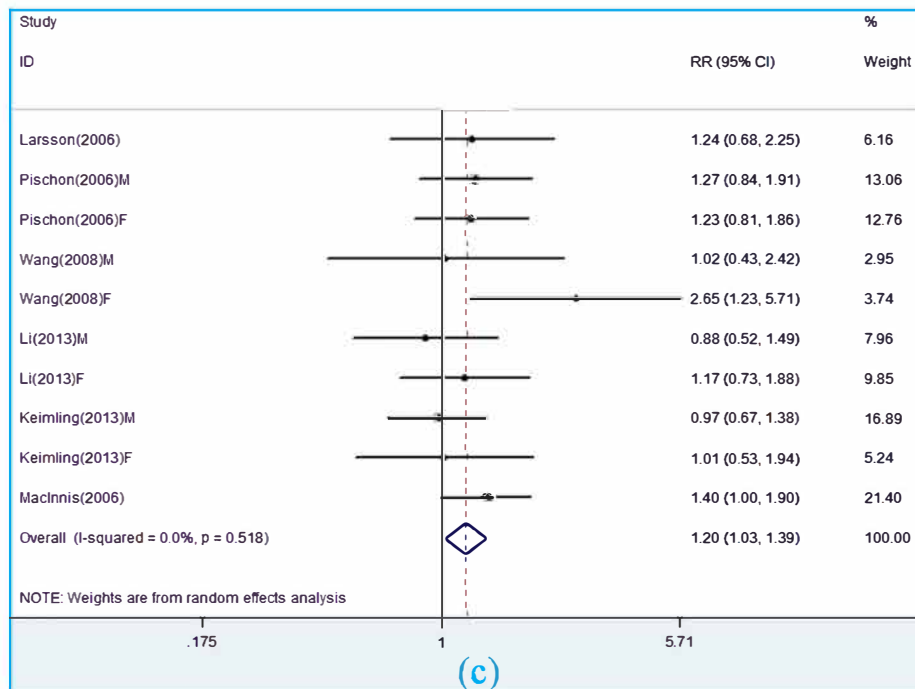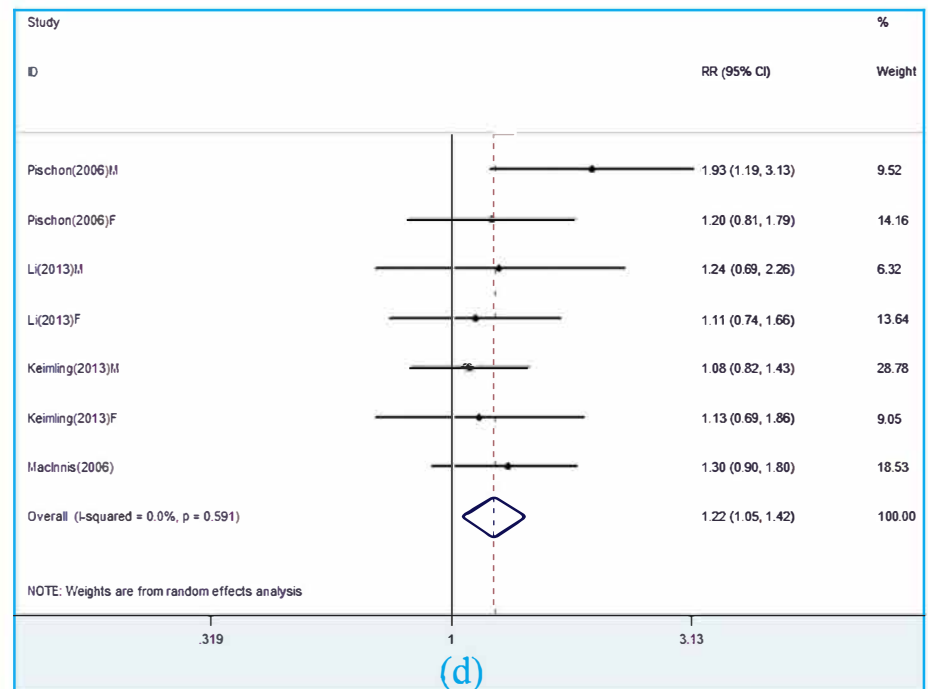

Supplement: bsr20170945_Supp1.pdf [file bsr20170945_Supp1.pdf]
